1 ***Smg5* is required for multiple nonsense-mediated mRNA decay pathways in**  
2 ***Drosophila***

3

4 **Jonathan O. Nelson<sup>\*1</sup>, Dominique Förster<sup>†2</sup>, Kimberly A. Frizzell<sup>\*3</sup>, Stefan**  
5 **Luschnig<sup>†</sup>, and Mark M. Metzstein<sup>\*</sup>**

6

7 **Affiliations:** <sup>\*</sup>Department of Human Genetics, University of Utah, Salt Lake City, UT,  
8 USA; <sup>†</sup>Institute of Neurobiology and Cells-in-Motion Cluster of Excellence (EXC 1003 –  
9 CiM), University of Münster, Badestrasse 9, D-48149 Münster, Germany

10 **Current addresses:** <sup>1</sup>Life Sciences Institute, University of Michigan, Ann Arbor,  
11 Michigan, USA; <sup>2</sup>Max Planck Institute of Neurobiology, Department Genes – Circuits –  
12 Behavior, Am Klopferspitz 18, 82152 Martinsried, Germany; <sup>3</sup>ARUP Laboratories, Salt  
13 Lake City, UT, USA.

14

15 **Running Title:** *Drosophila Smg5* mutants

16 **Key Words:** Nonsense-mediated mRNA decay; NMD; *Drosophila*; *Smg5*; *Smg6*;  
17 *pcm*; *Xrn1*

18

19 **Author for correspondence:**

20 Mark M. Metzstein

21 15 N 2030 E Salt Lake City, UT 84112 USA

22 Email: markm@genetics.utah.edu

23 Phone: (801)-585-9941

24

25

## ABSTRACT

26

27

28

29

30

31

32

33

34

35

36

37

38

39

40

41

42

43

44

45

The nonsense-mediated mRNA decay (NMD) pathway is a cellular quality control and post-transcriptional gene regulatory mechanism and is essential for viability in most multicellular organisms. A complex of proteins has been identified to be required for NMD function to occur, however the individual contribution of each of these factors to the NMD process is not well understood. Central to the NMD process are two proteins Upf1 (SMG-2) and Upf2 (SMG-3), which are found in all eukaryotes and are absolutely required for NMD in all organisms in which it has been examined. The other known NMD factors, Smg1, Smg5, Smg6, and Smg7 are more variable in their presence in different orders of organisms, and are thought to have a more regulatory role. Here we present the first genetic analysis of the NMD factor *Smg5* in *Drosophila*. Surprisingly, we find that unlike the other analyzed *Smg* genes in this organism, *Smg5* is essential for NMD activity. We found this is due at least in part to a role for Smg5 in the activity of two separable NMD-target decay mechanisms: endonucleolytic cleavage and 5'-to-3' exonucleolytic decay. Redundancy between these degradation pathways explains why some *Drosophila* NMD genes are not required for all NMD-pathway activity. We also found that while the NMD component *Smg1* has only a minimal role in *Drosophila* NMD during normal conditions, it becomes essential when NMD activity is compromised by partial loss of *Smg5* function. Our findings suggest that not all NMD complex components are required for NMD function at all times, but instead are utilized in a context dependent manner *in vivo*.

46

47

## INTRODUCTION

48

49

50

51

52

53

54

55

56

57

58

59

60

61

62

63

64

65

66

67

68

Eukaryotic cells utilize a number of pathways to maintain error-free translation so as to preserve the fidelity of protein function (Adjibade and Mazroui 2014). Nonsense-mediated mRNA decay (NMD) is one such pathway, which prevents the translation of potentially harmful truncated proteins by recognizing and destroying mRNAs that contain erroneous premature-termination codons (PTCs) (Celik *et al.* 2015). In addition to this cellular quality control function, NMD degrades many endogenous wild-type mRNAs as a mechanism of post-transcriptional gene regulation (Peccarelli and Kebaara 2014).

While the phenomenon of NMD has been well characterized for several decades, the mechanisms initiating target recognition and degradation are still not well understood and it remains unclear if all the factors required for NMD activity have even been identified. Genes required for NMD were first found by genetic screens in yeast and *C. elegans*, which led to the identification of seven proteins required for NMD (Hodgkin *et al.* 1989; Leeds *et al.* 1991; 1992; Cali *et al.* 1999). Three of these genes, Upf1, Upf2, and Upf3, are present in every eukaryote examined, while the other four, Smg1, Smg5, Smg6, and Smg7, have variable presence across species (Siwaszek *et al.* 2014). In the absence of any one of these factors, PTC-containing mRNAs and endogenous targets are not efficiently degraded and instead accumulate in the cell (Gatfield *et al.* 2003; Rehwinkel *et al.* 2005). The molecular identities and biochemical characterization of the individual NMD genes have revealed clues about their roles in the NMD pathway. Upf1 is an ATP-dependent RNA helicase, and this activity is required for NMD (Czapinski *et al.* 1995; Weng *et al.* 1996a; b). Upf3 binds mRNAs both directly and through an

69 interaction with the exon-exon junction complex (EJC) (Gehring *et al.* 2003). Upf2 binds  
70 both Upf1 and Upf3, bridging an interaction between these two factors (He *et al.* 1997;  
71 Lykke-Andersen *et al.* 2000), helping stabilize Upf1-mRNA interactions. *Smg1* encodes a  
72 PIKK-like kinase that can phosphorylate Upf1. Loss of *Smg1* leads to reduced phospho-  
73 Upf1 in all organisms examined (Page *et al.* 1999; Yamashita *et al.* 2001; Grimson *et al.*  
74 2004). In contrast, Upf1 is hyper-phosphorylated in *C. elegans smg-5*, *smg-6*, or *smg-7*  
75 mutants in a *Smg1*-dependent manner (Page *et al.* 1999), and RNAi inhibition of *Smg5*,  
76 *Smg6*, or *Smg7* in mammalian cells also results in Upf1 hyper-phosphorylation (Okada-  
77 Katsuhata *et al.* 2012). The finding that loss of any of the *Smg* genes reduce the  
78 efficiency of the NMD pathway even though they result in opposite effects on the Upf1  
79 phosphorylation state has led to the concept that a cycle of Upf1  
80 phosphorylation/dephosphorylation is a critical aspect of the NMD process (Ohnishi *et al.*  
81 2003). The importance of Upf1 phosphorylation may be due to the 14-3-3-like domain  
82 found in *Smg5*, *Smg6*, and *Smg7* proteins (Fukuhara *et al.* 2005). This domain binds  
83 phosphorylated residues, suggesting that Upf1 phosphorylation by *Smg1* initiates binding  
84 of these factors to an NMD complex (Ohnishi *et al.* 2003). *Smg6* is an endonuclease that  
85 cleaves targeted mRNAs near the PTC site (Gatfield and Izaurralde 2004; Huntzinger *et al.*  
86 2008), suggesting that *Smg6* binding to Upf1 is likely required for degradation of  
87 NMD targets. The functions of *Smg5* and *Smg7* are less clear, but a complex of *Smg5*  
88 and *Smg7* has been shown to bind a subunit of the PP2A phosphatase, suggesting Upf1  
89 dephosphorylation may be mediated by these factors, likely after *Smg6*-mediated  
90 cleavage occurs (Anders *et al.* 2003; Ohnishi *et al.* 2003). Overall, these findings have  
91 led to a model in which Upf1 phosphorylation is critical for the NMD pathway, with

92 Smg1 being required to phosphorylate Upf1 to recruit Smg6 and initiate NMD target  
93 cleavage, and Smg5 and Smg7 being required to dephosphorylate Upf1 to promote  
94 complex disassembly and recycling to new target mRNAs.

95         However, arguing against this model, recent studies dissecting the binding of  
96 Smg5, Smg6, and Smg7 to Upf1 suggest that Upf1 phosphorylation by Smg1 may not be  
97 key for normal NMD activity. It has been demonstrated that Smg5, Smg6, and Smg7 can  
98 bind Upf1 in the absence of Smg1, and indeed Smg6 binds Upf1 through a non-  
99 phosphorylated domain in the protein, indicating that Upf1 phosphorylation is not  
100 required for complex assembly (Nicholson *et al.* 2014; Chakrabarti *et al.* 2014).  
101 Additionally, Upf1 hyper-phosphorylation has been shown to mitigate the effects of  
102 reduced Smg5, Smg6, or Smg7 function (Durand *et al.* 2016). These findings suggest a  
103 revised model in which Smg5, Smg6, and Smg7 all contribute to the initiation of NMD  
104 target degradation independent of Upf1 phosphorylation, but when NMD activity is  
105 inefficient, Smg1 phosphorylates Upf1 to enhance the binding of Smg5 and Smg7, thus  
106 increasing NMD efficiency (Durand *et al.* 2016). Supporting this model, Smg5 and Smg7  
107 have been shown in mammalian cell culture to interact indirectly with both decapping  
108 and deadenylation complexes (Cho *et al.* 2013; Loh *et al.* 2013), and thus may promote  
109 exonucleolytic degradation of NMD targets. Indeed, both endonucleolytic and  
110 exonucleolytic degradation products of endogenous NMD targets can be detected in  
111 mammalian cells (Lykke-Andersen *et al.* 2014; Schmidt *et al.* 2015; Colombo *et al.* 2017;  
112 Ottens *et al.* 2017). However, in part because experiments have been primarily performed  
113 in divergent cell lines, using different methods of gene manipulation and mostly studying  
114 transfected NMD target genes, it is unclear to what extent phosphorylation-independent

115 Upf1-binding and the recruitment of decapping and deadenylation complexes occur  
116 during normal NMD activity *in vivo*.

117 NMD is required for viability in most complex organisms, including plants,  
118 *Drosophila*, zebrafish, and mice (Medghalchi *et al.* 2001; Yoine *et al.* 2006; Arciga-  
119 Reyes *et al.* 2006; Metzstein and Krasnow 2006; Weischenfeldt *et al.* 2008; Kerényi *et*  
120 *al.* 2008; Wittkopp *et al.* 2009; Li *et al.* 2015). *Drosophila* lacking *Upf1* or *Upf2* die  
121 during early larval stages, with no animals surviving to adulthood (Metzstein and  
122 Krasnow 2006; Chapin *et al.* 2014). However, *Drosophila* lacking *Upf3*, *Smg1*, or *Smg6*  
123 can survive to adulthood (Chen *et al.* 2005; Metzstein and Krasnow 2006; Avery *et al.*  
124 2011; Frizzell *et al.* 2012). The viability of *Upf3*, *Smg1*, and *Smg6* mutants suggests that  
125 these animals have sufficient NMD activity to survive to adulthood, and indeed, these  
126 mutants display significant residual NMD activity. In particular, *Smg1* mutants show only  
127 a very small reduction in NMD activity (Chen *et al.* 2005; Metzstein and Krasnow 2006).  
128 *Smg5* is the only known *Drosophila* NMD gene for which loss-of-function mutations are  
129 yet to be described (the *Drosophila melanogaster* genome does not contain a *Smg7*  
130 orthologue (Chiu *et al.* 2003; Gatfield *et al.* 2003). Here we describe the first analysis of  
131 *Drosophila Smg5* mutants, and discover that *Smg5* is essential for NMD activity in this  
132 organism. By performing double-mutant analysis of NMD genes, we have found that  
133 *Smg1* becomes essential for NMD when *Smg5* function is compromised, and that *Smg5*  
134 functions in a *Smg6*-independent degradation pathway *in vivo*. Our findings are  
135 consistent with the model that *Smg1*-mediated phosphorylation is only required under  
136 conditions of abnormal NMD progression, and that *Drosophila* utilize multiple  
137 independent mechanisms to initiate NMD target degradation.

138

138

139

## MATERIALS AND METHODS

140 **Fly genetics:** *Drosophila melanogaster* stocks were raised on standard cornmeal/dextrose

141 food at 25°. The NMD mutant allele *Smg1*<sup>32AP</sup> (Metzstein and Krasnow 2006; Frizzell *et*

142 *al.* 2012) is on a *y w FRT*<sup>19A</sup> chromosome and *Smg6*<sup>292</sup> (Frizzell *et al.* 2012) is on an

143 *FRT*<sup>82B</sup> chromosome balanced over *TM6B, P{Dfd-EYFP} Sb<sup>1</sup> ca<sup>1</sup>* (Le *et al.* 2006). All

144 *Smg5* alleles are on *FRT*<sup>40A</sup> chromosomes and balanced over *CyO, P{Dfd-EYFP}* (Le *et*

145 *al.* 2006). Other alleles used were *Gadd45*<sup>F17</sup> (Nelson *et al.* 2016), *pcm*<sup>14</sup> (Waldron *et al.*

146 2015), *Upf2*<sup>25G</sup> (Metzstein and Krasnow 2006), and *DHR78*<sup>3</sup> (Fisk and Thummel 1998). *y*

147 *w FRT*<sup>19A</sup> was used as a control chromosome for all experiments for genes located on the

148 X-chromosome (*Smg1* and *pcm* alleles). *FRT*<sup>40A</sup> or *FRT*<sup>82B</sup> were respectively used as the

149 control chromosome for the experiments using *Smg5* or *Smg6* alleles. For viability tests,

150 animals containing mutant alleles over a balancer were mated for three days, and

151 offspring were collected for 10 days, beginning 10 days after mating was initiated. All

152 offspring were scored, and percent expected viable was determined by the ratio of

153 balancer negative animals to balancer positive animals.

154

155 **SV40 3'UTR constructs:** Deletion constructs of the SV40 3'UTR were made by one or

156 two round PCR amplification with Phusion polymerase (NEB) using a

157 pUASTeGFP::SV40 3'UTR plasmid as a template (Metzstein and Krasnow 2006).

158 Amplicons were used to replace the full-length SV40 3' UTR in a pUAST-eGFP plasmid

159 modified to contain an *attB* site-specific recombination site (a gift from Jyoti Misra and

160 Carl Thummel). All constructs were verified by sequencing and sent to Genetic Services,

161 Inc (Cambridge, MA) for injection and site-specific integration into the *attP16* (2nd

162 chromosome) strain (Venken *et al.* 2006). Expression levels of the modified SV40  
163 3'UTR constructs were measured by mating transgenic males to *y w FRT<sup>19A</sup>; e22c-GAL4*,  
164 *UAS-nlsDsRed2::SV40 3'UTR/CyO* and *y w FRT<sup>19A</sup> Upf2<sup>25G</sup>; e22c-GAL4, UAS-*  
165 *nlsDsRed2::SV40 3'UTR/CyO* females. Wandering third instar larvae expressing both  
166 DsRed and GFP were imaged using a Leica MZ16 fluorescence stereomicroscope.  
167  
168 **Screens for NMD-defective alleles:** The codon changes of all *Smg5* alleles can be found  
169 in **supplemental table 1**. For the mosaic genetic screen, males with an isogenized *FRT<sup>40A</sup>*  
170 2<sup>nd</sup> chromosome were starved for 8 hours, and then fed on sucrose containing 1% ethyl  
171 methanesulfonate overnight. Mutagenized males were then mated with *FRT<sup>40A</sup>; P{da-*  
172 *GAL4 w<sup>+</sup>} P{UAS-FLP} P{UAS-eGFP::SV40 3'UTR}* females (Wodarz *et al.* 1995), and  
173 F1 wandering L3 larvae were collected in glycerol and scored for mosaic enhanced GFP  
174 fluorescence using a Leica MZ 16F microscope equipped with epifluorescent  
175 illumination. Mutant mosaic animals were cleaned in PBS and placed in vials with food  
176 to continue development. After eclosion, candidate mutant lines were established and  
177 retested to confirm an NMD defect. Candidate alleles were tested for complementation  
178 with *Df(2L)BSC345* (Cook *et al.* 2012), which deletes the *Smg5* locus, and lines that  
179 failed to complement this deficiency for lethality or fluorescence enhancement were  
180 balanced over *CyO, P{Dfd:eYFP w<sup>+</sup>}* (Le *et al.* 2006).

181 The screen for embryos with enhanced reporter expression is described in Förster  
182 *et al.* (2010). Briefly, flies carrying NMD-sensitive UAS-GFP and UAS-Verm-mRFP  
183 reporters expressed in the tracheal system were mutagenized with EMS and F2 lines were  
184 established. F3s embryos were examined for reporter expression in tracheal cells.



185

186 **RNA isolation and quantification:** For qRT-PCR analyses, we collected five to ten  
187 larvae from 0-4 h after the L2-L3 molt and froze them in liquid nitrogen. We isolated  
188 total RNA using TRIzol reagent (Invitrogen) and Phase-Lock tubes (5-Prime), and the  
189 RNeasy mini kit (QIAGEN). We used on-column RNase-free DNase treatment  
190 (QIAGEN) to reduce genomic contamination. We determined RNA concentration by  
191 spectrophotometer and normalized concentration for reverse transcription. For reverse  
192 transcription, we used random decamers and MMLV8 reverse transcriptase (Retroscript  
193 Kit, Ambion). We performed qRT-PCR analysis using the SYBR Green qPCR Supermix  
194 (Bio-Rad) and the Bio-Rad iCycler thermocycler. All experimental reactions were  
195 performed using three technical replicates and a minimum of three biological replicates  
196 per condition, and the expression level of all experimental assays was normalized to  
197 *RpL32* mRNA expression. For all qRT-PCR analyses we also measured samples that had  
198 been made without reverse transcriptase to ensure that signal was not due to  
199 contamination with genomic DNA.

200 Primer sequences used were RpL32\_1 (ATGCTAAGCTGTCGCACAAA), RpL32\_2  
201 (CGATGTTGGGGCATCAGATAC), Gadd45\_5'\_1  
202 (CATCAACGTGCTCTCCAAGTC), Gadd45\_5'\_2  
203 (CGTAGATGTCGTTCTCGTAGC), Gadd45\_3'\_1  
204 (ACAGCCAGATGTCACAGAATT), and Gadd45\_3'\_2  
205 (CCAGCAACTGGTTTCCATTAG). All *Gadd45* qPCR analysis was done using the  
206 Gadd45\_5' primer pair, unless otherwise noted.

207

208 **Analysis of *dHR78*<sup>3</sup> PTC allele stability:** We collected adult *Smg5*<sup>+/*G115*</sup> or *Smg5*<sup>*C391/G115*</sup>  
209 males that were also heterozygous for *dHR78*<sup>3</sup>, a PTC-containing allele that has lower  
210 expression than the wild-type allele and is stabilized in *Upf2*<sup>25*G*</sup> mutants, and thus is  
211 presumably degraded by NMD (Fisk and Thummel 1998; Nelson *et al.* 2016). At least  
212 three biological replicates were collected for each condition. We isolated RNA and  
213 generated cDNA, as described above, and used this cDNA as a template for PCR  
214 amplification of the *dHR78* transcript with the DRH78\_F3 / DHR78\_R3 primers  
215 (TGGGGCTTATTCAGAGTTCG / ATTAATGCTGGCCCACTCC), which flank the  
216 nonsense mutation. To compare the relative abundance of the *dHR78*<sup>3</sup> allele to the wild-  
217 type allele, PCR products were Sanger sequenced, and the relative peak intensity for a  
218 thymine (*dHR78*<sup>3</sup> allele) compared to a cytosine (wild-type allele) at nucleotide 1063.

219  
220 **Lethal phase and larval development analysis:** For lethal phase and larval  
221 development analysis, first-instar larvae were collected 20-24 hours after egg lay. Every  
222 24 hours, animals were examined to record their developmental stage and transferred to  
223 fresh food. Larval stage was determined based on physical characteristics of the mouth  
224 hooks. Once animals entered pupariation, pupae were transferred to vials and scored for  
225 eclosion five days later.

226  
227 **Statistical Analysis:** All viability assay figures represent the proportion of animals of the  
228 indicated genotypes that survive to adulthood; error bars for these figures represent the  
229 95% confidence interval of the binomial distribution, and the Test of Equal or Given  
230 Proportions was used to determine significance difference in these proportions between  
231 genotypes. For each individual experiment, conditions were compared directly to the

232 control, so no p-value correction was applied. All other figures represent the mean value  
233 of multiple replicates and display error bars representing  $\pm 2$  SEM. For tests between two  
234 variable measures, a two-sided paired Student's t-test was used to determine significance  
235 difference between mean value data. Those qPCR experiments that compared a condition  
236 to the control, which was set to a constant of 1, were performed with a one-sided  
237 Student's t-test.

238

239 **Data Availability:** *Drosophila* strains are available upon request. All data is presented  
240 within the figures.

241

242

## RESULTS

243 **Isolation of *Smg5* mutant alleles:** To identify *Drosophila Smg5* mutant alleles, we used  
244 two different genetic screens. First, we performed an EMS-mutagenesis screen in mosaic  
245 animals expressing an NMD-sensitive GFP reporter, a method similar to one we  
246 previously used to recover *Smg6* alleles (Frizzell *et al.* 2012). This reporter expresses  
247 GFP from a pUAST construct (Brand and Perrimon 1993) bearing a UAS promoter and  
248 an NMD-sensitive *SV40* 3'UTR (Metzstein and Krasnow 2006). We generated mosaics  
249 using the *da-GAL4* driver to ubiquitously express FLP-recombinase (**Figure 1A**).  
250 Individual homozygous mutant cells with defective NMD activity show increased  
251 reporter expression and GFP fluorescence (**Figure 1A**). The mosaic enhanced  
252 fluorescence phenotype was easy to distinguish in late L3 larvae (**Figure 1B**), and mosaic  
253 animals remain viable and fertile, so even lethal alleles can be recovered from individual  
254 mutants. An added benefit of this approach is that by mutagenizing animals that have an  
255 *FRT* site located near the centromere on the left arm of the second chromosome (*FRT<sup>40A</sup>*),  
256 we could specifically isolate mutations only on this chromosome arm. Since *Smg5* is  
257 located on the left arm of the second chromosome, mutations identified from the screen  
258 would likely include *Smg5* alleles. Using this approach, we screened 12,554 larvae and  
259 identified three mutants with mosaic enhancement of GFP fluorescence (**Figure 1C**). We  
260 found each of these three mutants were homozygous lethal. We crossed each allele to a  
261 deficiency that deletes *Smg5* and found that all three failed to complement for lethality,  
262 suggesting that they had mutations in *Smg5*.

263 Our second screen was of animals expressing a *GFP::SV40 3'UTR* reporter in the  
264 embryonic tracheal system (Förster *et al.* 2010). This screen identified four mutants that  
265 showed increased fluorescence (**Figure 1D, Supplemental Figure 1**). All four of these  
266 alleles failed to complement a *Smg5* deficiency using increased fluorescence signal as an  
267 assay (data not shown), indicating they contained mutations in *Smg5*. As expected for  
268 mutations disrupting NMD-pathway function (Metzstein and Krasnow 2006), the  
269 increase in fluorescence was independent of the fluorescent reporter examined, with both  
270 GFP and mRFP showing similar increases in expression in a homozygous mutant  
271 background (**Supplemental Figure 1F**).

272 Finally, sequencing of the *Smg5* locus in the seven candidate lines revealed they  
273 all contained mutations in *Smg5*, including nonsense mutations (*G115*, *A1*, *E11*, and  
274 *M11*), an altered splice acceptor site (*C391*), and missense mutations in highly conserved  
275 alpha-helices of the *Smg5* 14-3-3-like domain (*Q454* and *Q376*) (Fukuhara *et al.* 2005)  
276 (**Figure 1D; Supplemental Table 1**).

277

278 ***Smg5* is an essential NMD factor in *Drosophila*:** *Drosophila* lacking any functional  
279 NMD activity, such as *Upf1* and *Upf2* null mutants, fail to develop to adulthood, dying  
280 primarily during early larval stages (Chapin *et al.* 2014). We found that the *Smg5*  
281 nonsense alleles *A1*, *E11*, *M11*, and *G115*, and splice acceptor site allele *C391* all failed to  
282 survive to adulthood when over a deficiency that deletes *Smg5*, or as *Smg5*<sup>*C391/G115*</sup> trans-  
283 heterozygotes (**Figure 2A**). The lethality of these alleles combined with their molecular  
284 aberrations suggested that they are complete loss-of-function mutations. We found that  
285 *Smg5*<sup>*C391/G115*</sup> mutants have developmental delays, with *Smg5* mutants spending almost

286 twice as long in larval stages as control animals (**Supplemental Figure 2A**), and most  
287 *Smg5*<sup>C391/G115</sup> mutants die during pupariation (**Supplemental Figure 2B**). This  
288 developmental delay and lethal phase is similar to, but somewhat weaker than, the  
289 developmental defects of null *Upf1* and *Upf2* mutants (Chapin *et al.* 2014). Conversely,  
290 the missense alleles *Q454* and *Q376* were viable over the deficiency and each other  
291 (**Figure 2A**), suggesting that these are likely hypomorphic alleles.

292 Lethal mutations in *Drosophila* NMD genes generally have severe defects in  
293 NMD function, as measured by increased expression of endogenous NMD targets  
294 (Metzstein and Krasnow 2006; Avery *et al.* 2011; Frizzell *et al.* 2012). To test if lethal  
295 *Smg5* mutant alleles also have strong defects in NMD activity, we used qRT-PCR to  
296 measure the expression of the endogenous NMD target *Gadd45* (Chapin *et al.* 2014;  
297 Nelson *et al.* 2016). Since *Gadd45* is directly targeted by NMD, the amount of *Gadd45*  
298 mRNA in mutants serves as a measure of the decrease in NMD activity. We measured  
299 *Gadd45* mRNA levels in early third instar larvae and found that *Smg5*<sup>C391/G115</sup> mutants  
300 had a large increase in *Gadd45* mRNA expression. In contrast, viable *Smg5*<sup>Q454/G115</sup>  
301 mutants showed a much smaller increase in *Gadd45* levels (**Figure 2B**). Increased  
302 *Gadd45* expression is a major factor contributing to the death of *Upf1* and *Upf2* mutants,  
303 and loss of *Gadd45* can suppress *Upf1* and *Upf2* mutant lethality (Nelson *et al.* 2016).  
304 We found that loss of *Gadd45* also suppresses the lethality of *Smg5*<sup>C391/G115</sup> mutants  
305 (**Figure 2A**), indicating that these animals are dying due to a similar loss of NMD  
306 function as *Upf1* or *Upf2* mutants. These results strongly suggest that *Smg5* mutant  
307 lethality is specifically due to a loss of NMD activity, and not due to loss of any NMD-  
308 independent *Smg5* function.

309

310 ***Smg5* null mutants lack most, if not all, detectable NMD activity:** To directly test if  
311 *Drosophila Smg5* mutants have any residual NMD activity, we measured the relative  
312 stability of PTC-containing mRNAs in *Smg5* mutants. We found that *Smg5*<sup>C391/G115</sup>  
313 mutants fully stabilized the expression of the PTC-containing *dHR78*<sup>3</sup> mRNA relative to  
314 the expression of wild-type *dHR78* mRNA (**Figure 2C**), indicating NMD-mediated  
315 degradation of PTC-containing mRNA is absent. Since Smg6-mediated cleavage is a  
316 known mechanism for degradation of NMD targets in *Drosophila*, we tested if *Smg5*  
317 mutants still retain this endonuclease activity. NMD-target cleavage can be observed  
318 through measuring the relative abundance of NMD-target mRNA fragments 5' to the stop  
319 codon in relation to fragments 3' to the stop codon (**Figure 2D**) in animals lacking the  
320 only cytoplasmic 5'-to-3' exonuclease Xrn1, which is encoded by the gene *pacman* (*pcm*)  
321 (Till *et al.* 1998). Null *pcm* mutants have no 5'-to-3' exonuclease activity (Waldron *et al.*  
322 2015), and thus mRNAs cleaved by Smg6 near the stop codon show increased abundance  
323 of the 3' cleavage fragment compared to the 5' fragment (Nelson *et al.* 2016). We found  
324 this bias to be lost in the absence of *Smg6* (**Figure 2E**), confirming that it is caused by  
325 Smg6 endonuclease activity. Interestingly, we found that the preferential stabilization of  
326 the 3' fragment is also lost in double mutants of the null alleles of *pcm* and *Smg5* (**Figure**  
327 **2E**), revealing that Smg5 is required for Smg6 endonuclease activity. These combined  
328 results indicate that *Drosophila Smg5* mutants lack any NMD activity.

329 As an additional gauge of NMD activity in *Smg5* mutants, we directly measured  
330 fluorescence levels of NMD-sensitive reporters in homozygous mutant embryos (**Figure**  
331 **3**). We found that homozygous *Smg5*<sup>C391</sup> embryos exhibited ~5-fold increase in

332 fluorescent signal compared to *Smg5*<sup>+</sup> embryos, comparable to the increase in GFP  
333 mRNA levels observed in the strongest previously measured NMD mutant, *Upf2*<sup>25G</sup>  
334 (Metzstein and Krasnow 2006). As expected, embryos homozygous for the hypomorphic  
335 allele *Smg5*<sup>Q454</sup> showed a smaller increase in fluorescent signal, while the trans-  
336 heterozygous combination *Smg5*<sup>C391/Q454</sup> showed an intermediate signal, close to the  
337 *Smg5*<sup>Q454</sup> signal. To provide a direct comparison of the *Smg5* mutant fluorescence to  
338 other reporters, we generated a series of deletion constructs of the NMD-sensitive SV40  
339 3'UTR and tested each construct for expression level and ability to be enhanced by loss of  
340 NMD activity (**Supplemental Figure 4**). We found that, in general, the shorter the  
341 deletion construct the higher the absolute expression level and the less this expression  
342 was enhanced by loss of NMD, though for a given length of construct, the exact location  
343 of the deletion determined the degree of enhancement. These results are consistent with a  
344 model in which 3'UTR length is a major determinant of NMD sensitivity (Boehm *et al.*  
345 2014), though there is likely a contribution of specific sequence elements in modulating  
346 sensitivity. Most importantly, we found the construct with greatest enhancement in  
347 expression increased fluorescence levels 5-fold compared to the full-length SV40 3'UTR,  
348 almost exactly the same as the increase observed in the *Smg5* null mutant background  
349 (**Figure 3**). Hence, we conclude that loss of *Smg5* phenocopies loss of NMD sensitivity,  
350 suggesting *Smg5* is required for all NMD activity in embryos.

351

352 ***Smg5* mutant lethality is not *Smg1*-dependent:** The phosphorylation of Upf1 by Smg1  
353 has been proposed to be a critical step in the NMD process, at least in part by recruiting  
354 Smg6 to the NMD complex to initiate target degradation (Hug *et al.* 2016).



355 Dephosphorylation of Upf1 is thought to be mediated by Smg5, which interacts with the  
356 PP2A phosphatase; this activity may be required for complex disassembly after target  
357 degradation has been initiated (Ohnishi *et al.* 2003). This model thus proposes that the  
358 necessity of Smg5 for NMD activity requires Upf1 phosphorylation by Smg1, and thus it  
359 would be expected that *Smg1* mutants, which are fully viable and have robust NMD  
360 activity (Chen *et al.* 2005; Metzstein and Krasnow 2006; Frizzell *et al.* 2012), should  
361 suppress *Smg5* mutant lethality. In contrast to this prediction, we found that *Smg1*; *Smg5*  
362 double mutants were in fact no more viable than *Smg5* mutants (**Figure 4A**), and *Smg1*  
363 mutants had no effect on the developmental delay or lethal stage of *Smg5* mutants  
364 (**Supplemental Figure 2A, B**). These findings suggest that a failure to dephosphorylate  
365 Upf1 is not responsible for *Smg5* mutant lethality; however, the lethality of *Smg1*; *Smg5*  
366 double mutants may also be explained by unknown factors that phosphorylate Upf1 in the  
367 absence of Smg1.

368 If failure to dephosphorylate Upf1 causes lethality in both *Smg5* mutants and *Smg1*;  
369 *Smg5* double mutants, we would expect loss of *Smg1* to have no effect on the viability of  
370 hypomorphic *Smg5* mutants, since these alleles are viable (**Figure 2A**), and so should  
371 have sufficient Upf1-dephosphorylation. Surprisingly, we found that double mutants for a  
372 *Smg1* null allele and a hypomorphic *Smg5* allele show significant lethality, even though  
373 each mutation on its own is viable (**Figure 4A**). This result reveals that *Smg5* mutant  
374 lethality is not due to failure to dephosphorylate Upf1, but instead is consistent with an  
375 alternative proposed model that Upf1 phosphorylation by Smg1 is not required for NMD  
376 under normal conditions, but serves to enhance Smg6 and Smg5 efficiency upon stress  
377 conditions to reinforce NMD activity (Durand *et al.* 2016). In agreement with this model,

378 we found that the relative increase in *Gadd45* expression upon loss of *Smg1* is greater in  
379 this *Smg5* hypomorphic background than in animals with functioning *Smg5* (**Figure 4B**),  
380 indicating that *Smg1* has a greater contribution to NMD activity when *Smg5* functions  
381 inefficiently. Importantly, loss of *Smg1* has no greater impact on *Gadd45* expression in  
382 *Smg5* null mutants than in animals with functional *Smg5* (**Figure 4B**), indicating that the  
383 compensatory *Smg1* activity in *Smg5* hypomorphs is the enhancement of *Smg5* function,  
384 rather than an increase in *Smg5*-independent decay activity. Together, these findings  
385 indicate that the requirement of *Smg5* for NMD activity is independent of *Smg1*, but that  
386 *Smg1* can enhance *Smg5* activity when NMD function is compromised.

387

388 **Smg1 is not required for Smg6 activity:** *Smg6* has been shown to bind *Upf1* at residues  
389 phosphorylated by *Smg1* (Fukuhara *et al.* 2005; Okada-Katsuhata *et al.* 2012), leading to  
390 the model that *Smg1* is required for *Smg6* complex entry and cleavage of NMD targets.  
391 However, *Drosophila Smg6* mutants have much stronger NMD defects than *Smg1*  
392 mutants (Frizzell *et al.* 2012), and *Smg6* has recently been shown to be capable of  
393 binding non-phosphorylated *Upf1* (Nicholson *et al.* 2014; Chakrabarti *et al.* 2014). These  
394 data suggest an alternative model in which *Smg6* can cleave NMD targets even in the  
395 absence of *Smg1* kinase activity. In support of this latter model, we found using our 3'  
396 fragment stabilization assay that *Gadd45* mRNA is cleaved in the absence of *Smg1* just as  
397 efficiently as in animals with wild-type *Smg1* (**Figure 5A**). We also found the same  
398 relative increase in *Gadd45* mRNA levels upon loss of *Smg6* in animals with or without  
399 functional *Smg1* (**Figure 5B**). Consistent with this finding, double mutants between null  
400 *Smg1* and *Smg6* alleles do not have reduced viability or enhanced developmental delay

401 compared to *Smg6* single mutants (**Figure 5C; Supplemental Figure 2C**). Together,  
402 these data suggest that *Smg1* does not contribute to NMD-independent *Smg6* function,  
403 and that *Smg1* is not required for normal *Smg6* activity *in vivo*.

404

405 ***Smg5* is required for 5'-to-3' Xrn1-mediated exonucleolytic degradation of NMD**

406 **targets:** The stronger defects observed in *Smg5* mutants than *Smg6* mutants indicate that  
407 more than just *Smg6* activity is disrupted in *Smg5* mutants. *Smg5* has been shown in  
408 mammalian cell culture to interact indirectly with decapping and deadenylation  
409 complexes (Cho *et al.* 2013; Loh *et al.* 2013), however if either of these interactions  
410 occur during *in vivo* NMD targeting is unclear. Decapping of NMD targets is expected to  
411 lead to Xrn1-mediated 5'-to-3' exonucleolytic degradation. While inhibition of decapping  
412 factors or Xrn1 in *Drosophila* cells was found to have no effect on the levels of a PTC-  
413 containing reporter detected by northern blot (Gatfield and Izaurralde 2004), we have  
414 identified an increase in *Gadd45* expression in null *Xrn1* mutants by qRT-PCR *in vivo*  
415 (**Figure 5D**) (Nelson *et al.* 2016). Although this increase could be due to NMD-  
416 independent Xrn1 activity, we found that there is no difference in *Gadd45* expression  
417 upon loss of *Xrn1* activity in a *Smg5* mutant background (**Figure 5D**), indicating that  
418 Xrn1-mediated degradation of *Gadd45* mRNA requires *Smg5* activity. Importantly,  
419 *Gadd45* expression was measured using the qRT-PCR primer pair 5' to the *Gadd45* stop  
420 codon (**Figure 2D**), implying that Xrn1 can only degrade these mRNAs after decapping.  
421 These findings suggest that *Smg5* may be involved in promoting the decapping of NMD  
422 targets.

423

424

## DISCUSSION

425 The degradation of both specific normal and many kinds of erroneous mRNAs by the  
426 NMD pathway is a crucial gene regulatory mechanism and arose in the ancestors to all  
427 eukaryotes. While many factors required for NMD have been biochemically  
428 characterized, the individual contribution of each factor to the recognition and  
429 degradation of NMD targets is not fully understood, especially *in vivo* in complex  
430 organisms. Through our genetic analysis of *Smg5* in *Drosophila* and by examination of  
431 NMD-gene double mutants, we have found that NMD utilizes multiple mechanisms to  
432 promote target degradation *in vivo*. One of our main findings is that *Smg5* null mutants  
433 have as severe defects as either *Upf1* and *Upf2* null mutants, indicating that *Smg5* is a  
434 critical factor for promoting NMD-target recognition and/or decay. In support of this  
435 interpretation, we found that *Smg5* is required for both *Smg6*-mediated endonucleolytic  
436 cleavage of NMD targets and a separate, *Smg6*-independent, decay process that at least  
437 partially requires *Xrn1* 5'-to-3' exonuclease activity. Our findings are surprising, given  
438 that *Smg5* has primarily been thought to promote NMD complex recycling, but with only  
439 a secondary requirement to stimulate decay activity (Ohnishi *et al.* 2003). Instead, we  
440 propose that *Smg5* is a critical NMD factor necessary for at least two, independent NMD  
441 degradation mechanisms.

442 In contrast to *Smg5* having a critical role in target degradation, our data is less  
443 supportive for a *Smg5* function in NMD complex recycling. The phosphorylation of *Upf1*  
444 at multiple residues by *Smg1* (Yamashita *et al.* 2001; Grimson *et al.* 2004) is thought to  
445 be required to initiate, or at least stimulate, NMD-mediated degradation (Anders *et al.*

446 2003; Ohnishi *et al.* 2003). Subsequent Smg5-mediated recruitment of the PP2A  
447 phosphatase to the NMD complex is thought to lead to Upf1 dephosphorylation to  
448 promote complex disassembly and recycling (Anders *et al.* 2003; Ohnishi *et al.* 2003).  
449 While Smg1, and thus Upf1 phosphorylation, does not seem to play a major role in NMD  
450 in *Drosophila* (Chen *et al.* 2005; Metzstein and Krasnow 2006), failure to  
451 dephosphorylate Upf1 could still be the cause of the strong NMD defect in *Drosophila*  
452 *Smg5* mutants. This model predicts that since *Smg5* mutant lethality is due to lack of  
453 Upf1 dephosphorylation, the loss of *Smg1* should be epistatic to the loss of *Smg5*, since  
454 Upf1 dephosphorylation would no longer be required in *Smg1* mutant animals. However,  
455 we found just the opposite: *Smg1* mutations do not suppress *Smg5* mutations at all, and  
456 *Smg1* mutants actually enhance the defect of *Smg5* hypomorphic alleles. These data are  
457 instead consistent with a more recently proposed model in which Upf1 phosphorylation is  
458 only required when the NMD process is “stalled” or otherwise becomes impaired  
459 (Durand *et al.* 2016), such as occurs in hypomorphic *Smg5* mutants. Based on our  
460 findings, we propose that NMD functions under two states: non-phosphorylated Upf1,  
461 which requires Smg5 to stimulate both Smg6-mediated and Smg6-independent decay,  
462 and phosphorylated Upf1, which enhances an interaction of Smg6 with Upf1 and  
463 stimulates Smg6-mediated decay independently of Smg5. For most substrates under  
464 normal conditions the former mechanism predominates, with the later only occurring  
465 when the first process does not efficiently occur. Additionally, some specific substrates  
466 may require Smg1-stimulated NMD by default. For instance, while loss of Smg1 leads to  
467 barely detectable stabilization of a PTC-containing substrate (Chen *et al.* 2005; Metzstein  
468 and Krasnow 2006), there is a significant (>2-fold) increase in endogenous substrates,

469 such as *Gadd45*, and reporters using the NMD-sensitive SV40 3'UTR (Metzstein and  
470 Krasnow 2006; Frizzell *et al.* 2012). The difference in targeting between these alternative  
471 substrates is not yet known, but there is indication of differential pathway usage also in  
472 mammalian cells (Chan *et al.* 2007; Ottens *et al.* 2017).

473         The stronger NMD defects observed in *Smg5* null mutants compared to *Smg6* null  
474 mutants suggest that *Smg5* is required for a *Smg6*-independent decay activity. While the  
475 mechanism of this decay remains unclear, there is *in vitro* evidence that *Smg5* can  
476 interact with the Dcp decapping complex (Cho *et al.* 2009; 2013; Loh *et al.* 2013),  
477 recruiting the complex to the NMD target and eventually leading to exonucleolytic decay  
478 initiated at the 5' end of the message. Additionally, global analysis of NMD-decay  
479 intermediates suggests that the degradation of NMD substrates mainly occurs through  
480 *Smg6*-mediated endonucleolytic cleavage, but that substrates bypassing this decay  
481 process may go through an alternative decapping-mediated process (Lykke-Andersen *et*  
482 *al.* 2014). However, whether this alternative process is actually used *in vivo*, and whether  
483 it depends on *Smg5* has not been genetically examined. By examining decay in *Xrn1*  
484 *Smg5* double mutants we have not obtained such evidence. *Xrn1* is expected to have a  
485 role in both *Smg6*-mediated endonucleolytic decay and 5' decapping decay, but with  
486 measurably different effects. In *Smg6*-mediated decay, *Xrn1* is expected to be required  
487 for the degradation of the RNA fragment 3' to the cleavage site, and we and others have  
488 demonstrated such a requirement *in vivo* and in cell culture. However, in decapping-  
489 dependent decay, *Xrn1* is expected to be required for the degradation of the entire  
490 mRNA, including sequence 5' to the cleavage site. Here, we have shown that degradation  
491 of an NMD substrate 5' to the predicted *Smg6*-cleavage site is in at least in part

492 dependent on both Smg5 and Xrn1, indicating an *in vivo* role for Smg5-mediated  
493 decapping in NMD substrate degradation. The incomplete loss of NMD activity in *Smg6*  
494 mutants suggests that Smg6-independent decay is sufficient to maintain most NMD  
495 activity. It is also possible that the preference for which decay mechanism degrades NMD  
496 targets may be different between individual NMD targets. Furthermore, the choice  
497 between decay mechanisms may differ in tissue-specific or developmental contexts. It  
498 will be important to parse the relative contribution of each decay pathway to the  
499 degradation of NMD targets to understand the mechanism underlying the bias in decay.

500         Here we performed the first double mutant analysis of multiple NMD factors,  
501 providing genetic evidence of the relative contribution of individual NMD genes. We  
502 also characterized the first *Drosophila Smg5* mutants, identifying that *Smg5* is critical for  
503 NMD function and viability, similar to *Upf1* and *Upf2*, and providing the first genetic  
504 evidence for an essential role of *Smg5* function in a model system. Our findings suggest  
505 that NMD utilizes multiple branched decay mechanisms to destroy its targets. All of these  
506 pathways depend on *Smg5*, indicating that *Smg5* plays more fundamental roles in NMD  
507 than has previously been appreciated. More closely characterizing the molecular  
508 mechanisms of Smg5 function in NMD may reveal novel key features of NMD activity  
509 that have thus far escaped detection.

510

510

511 **Acknowledgements**

512

513           We thank x for critical comments on the manuscript. We are very grateful to  
514 Sarah Newbury for providing fly stocks prior to publication. Fly stocks were obtained  
515 from the Bloomington *Drosophila* Stock Center. KAF was supported by University of  
516 Utah Developmental Biology Training Grant 5T32-HD07491. Work in SL's laboratory  
517 was supported by the Swiss National Science Foundation (SNF\_31003A\_141093/1), the  
518 University of Zurich, the "Cells-in-Motion" Cluster of Excellence (EXC 1003-CiM), the  
519 Deutsche Forschungsgemeinschaft (DFG\_LU 1398/2-1), and the University of Münster.  
520 Work in MMM's laboratory was supported by National Institutes of Health (NIH) grant  
521 1R01GM084011 and a March of Dimes Award 5-FY07-664.



522

523 **Figure 1. Mosaic screen for novel NMD-defective mutations on the 2<sup>nd</sup> chromosome**

524 **identifies *Smg5* alleles.** (A) Scheme to generate mosaics and detect mutants with

525 defective NMD. The GAL4 transcription factor is ubiquitously expressed under a

526 *daughterless* (*da*) promoter and activates transcription of *FLP* recombinase and the

527 NMD-sensitive *eGFP::SV40 3'UTR* fluorescent reporter, both under UAS control. The

528 reporter mRNA is usually degraded by NMD, and thus cells lacking NMD activity due to

529 a homozygous mutation in a gene required for NMD activity show increased green

530 fluorescence. (B) Example of mosaic GFP-reporter fluorescence phenotype detected in

531 our screen. Late L3 larvae expressing the NMD sensitive *eGFP::SV40 3'UTR* fluorescent

532 reporter in animals with a wild-type *FRT<sup>40A</sup>* chromosome (left) or an *FRT<sup>40A</sup> Smg5<sup>G115</sup>*

533 chromosome (right). Individual homozygous mutant cells with increased GFP

534 fluorescence in the *Smg5* mutant animal are indicated by white arrows. Overall increased

535 fluorescence is due to other out of focus mutant cells. Dorsal view; anterior at top. (C)

536 Scheme for recovering mutations identified in the screen. The total number of candidate

537 mutants scored in each generation is shown on the left side of each row. Genotypes on

538 the left in the F1 and F2 generations are the offspring from the previous mating. (D)

539 Molecular identity of isolated *Smg5* mutations. Four alleles (*A1*, *E11*, *M11*, and *G115*) are

540 nonsense mutations. *C391* is a mutation in a splice acceptor site. *Q454* and *Q376* are

541 missense mutations. The codon changes of all *Smg5* alleles are listed in **Supplemental**

542 **Table 1.**

543

544 **Figure 2. *Smg5* is required for viability and NMD activity in *Drosophila*.** (A) Adult  
545 viability of *Smg5* mutant alleles *trans*-heterozygous to either a deficiency removing the  
546 *Smg5* locus (*Df*) or other *Smg5* mutant alleles. Error bars represent 95% confidence  
547 interval of the binomial distribution. p-value listed compared to *Smg5*<sup>+</sup> / *Df* condition or  
548 between indicated conditions determined by the test of equal or given proportions. n =  
549 total number of animals scored. (B) Expression of the endogenous NMD target *Gadd45*,  
550 as measured by qRT-PCR. Error bars represent 2 SEM. p-value listed for each condition  
551 compared to controls or between indicated conditions, determined by two-sided Student's  
552 t-test. n ≥ 3 for all conditions. (C) Relative abundance of PTC-containing *dHR78*<sup>3</sup> allele  
553 (Fisk and Thummel 1998) mRNA compared to wild-type *dHR78* allele mRNA in animals  
554 heterozygous for *dHR78*<sup>3</sup> in each indicated genotype. Error bars represent 2 SEM. p-  
555 value listed for each condition compared to + / *Smg5*<sup>G115</sup>, determined by two-sided  
556 Student's t-test. n = 3 for all conditions. (D) Diagram of the endogenous NMD target  
557 *Gadd45* transcript and 5' and 3' qRT-PCR primer pairs. Open boxes indicate UTRs; grey  
558 boxes indicate coding regions. 5' primer pair is located 5' to the stop codon and the 3'  
559 primer pair is 3' to the stop codon. (E) *Gadd45* expression measured with the 3' primer  
560 pair relative to the 5' primer pair. The 3' region is preferentially stabilized in *pcm*<sup>14</sup>  
561 mutants. This preferential stabilization is lost when either *Smg6* or *Smg5* are lost. Error  
562 bars represent 2 SEM. p-value listed for each condition compared to the *pcm*<sup>+</sup> condition  
563 or between indicated conditions, determined by two-sided Student's t-test. n ≥ 3 for all  
564 conditions.

565

565 **Figure 3. Loss of *Smg5* enhances NMD-sensitive reporter expression in embryos. (A-**  
566 **E)** embryos of indicated genotypes carrying GFP reporter transgene with full-length  
567 NMD-sensitive SV40 3'UTR (pUAST-GFP) or NMD-insensitive SV40 3'UTR deletion  
568 construct (pUAST-GFP- $\Delta$ 3'UTR). **(F)** Scan of GFP intensity averaged across three areas  
569 of embryo (shown in inset) in animals of the indicated genotype. FL, full-length SV40  
570 3'UTR;  $\Delta$ , SV40 3'UTR deletion construct; n, number of embryos scored.  
571

571 **Figure 4. *Smg5* mutant lethality is not dependent on *Smg1*.** (A) Adult viability of  
572 *Smg1* and *Smg5* hypomorph single and double mutants. Error bars represent 95%  
573 confidence interval of the binomial distribution. p-value listed for each condition  
574 compared to *Smg1*<sup>32AP</sup> or between indicated conditions determined by the test of equal or  
575 given proportions. n = total number of animals scored. (B) Relative expression of the  
576 endogenous NMD target *Gadd45* in *Smg1*<sup>32AP</sup> mutants compared to *Smg1*<sup>+</sup> controls in  
577 *Smg5*<sup>+</sup> and mutant backgrounds as measured by qRT-PCR. Error bars represent 2 SEM.  
578 p-value listed for each condition compared to *Smg5*<sup>+</sup> determined by two-sided Student's  
579 t-test. n ≥ 3 for all conditions.  
580

580

581 **Figure 5. *Smg1* is not required for *Smg6* activity and *Smg5* is required for**

582 **exonucleolytic NMD activity. (A)** *Gadd45* 3' expression relative to 5' expression in  
583 indicated genotypes, measured by qRT-PCR. The 3' region is preferentially stabilized in  
584 *pcm*<sup>14</sup> mutants with or without functional *Smg1*. Error bars represent 2 SEM. p-value  
585 listed for each condition compared to *pcm*<sup>+</sup> or between indicated conditions determined  
586 by two-sided Student's t-test. n ≥ 3 for all conditions. **(B)** Relative expression of the  
587 endogenous NMD target *Gadd45* measured by qRT-PCR using the 5' primer pair in  
588 *Smg6*<sup>292/Df</sup> mutants compared to *Smg6*<sup>+</sup> controls in either *Smg1*<sup>+</sup> or *Smg1*<sup>32AP</sup> mutant  
589 backgrounds. Error bars represent 2 SEM. p-value between conditions determined by  
590 two-sided Student's t-test. n ≥ 3 for all conditions. **(C)** Adult viability of *Smg1*<sup>32AP</sup> and  
591 *Smg6*<sup>292/Df</sup> null mutants, and *Smg1*<sup>32AP</sup>; *Smg6*<sup>292/Df</sup> double mutants. Error bars represent  
592 95% confidence interval of the binomial distribution. p-value listed between indicated  
593 conditions determined by the test of equal or given proportions. n displays total number  
594 of animals scored. **(D)** Relative expression of the endogenous NMD target *Gadd45* in  
595 *pcm* mutants as measured by qRT-PCR. Expression is normalized to the *pcm*<sup>+</sup> condition  
596 in either a *Smg5*<sup>+</sup> or *Smg5*<sup>C391/G115</sup> condition. Error bars represent 2 SEM. p-value listed  
597 between indicated conditions determined by two-sided Student's t-test. n ≥ 3 for all  
598 conditions.

599

600 **Supplemental Figure 1. *Smg5* mutant alleles have enhanced fluorescence of NMD-**  
601 **sensitive reporters in first instar larval trachea. (A-E)** NMD sensitive *eGFP::SV40*  
602 *3'UTR* fluorescent reporter is expressed in larval trachea by the *btl-GAL4* driver in  
603 control (A) and *Smg5* mutant animals (B-E). (F) *UAS-GFP:SV40 3'UTR* and *UAS-Verm-*  
604 *mRFP:3'UTR* coexpressed in the embryonic tracheal system both show fluorescence  
605 enhancement (top row of embryos), compared to controls (bottom row of embryos).

606

607 **Supplemental Figure 2. Lethal phase and developmental delays of single and double**

608 **mutants for NMD genes. (A)** Average number of days spent during larval stages of

609 animals that entered pupariation in each indicated genotype. Error bars represent 2 SEM.

610 **(B)** Percentage of animals that die during larval development, pupal development, or

611 adulthood in indicated genotypes. Error represents 95% confidence interval of the

612 binomial distribution. \* indicates adjusted p-value < 0.05 compared to lethality of control

613 condition at that stage.

614

614 **Supplemental Figure 3. SV40 3'UTR deletion constructs tested for expression and**  
615 **NMD sensitivity.** The full length 3' UTR is shown in schematic and length given in base-  
616 pairs (bp). Cyan box, SV40 3' UTR intron; blue boxes, predicted polyadenylation sites;  
617 dashed line, internal deletions. Expression level is the GFP signal observed when  
618 expressing the construct using an *e22c-GAL4* (epithelial) driver, normalized to the  
619 expression observed in the full-length construct. NMD sensitivity is the ratio of  
620 expression in an *Upf2<sup>25G</sup>* genetic background compared to a *Upf2<sup>+</sup>* genetic background  
621 (the higher the value the more sensitive the construct is to loss of NMD). For the  
622 experiments shown in Figure 3, the deletion used was the 100bp construct.  
623



623

624

## REFERENCES

- 625 Adjibade P., Mazroui R., 2014 Control of mRNA turnover: implication of cytoplasmic  
626 RNA granules. *Semin. Cell Dev. Biol.* **34**: 15–23.
- 627 Anders K. R., Grimson A., Anderson P., 2003 SMG-5, required for *C.elegans* nonsense-  
628 mediated mRNA decay, associates with SMG-2 and protein phosphatase 2A. *EMBO*  
629 *J.* **22**: 641–650.
- 630 Arciga-Reyes L., Wootton L., Kieffer M., Davies B., 2006 UPF1 is required for  
631 nonsense-mediated mRNA decay (NMD) and RNAi in Arabidopsis. *Plant J.* **47**: 480–  
632 489.
- 633 Avery P., Vicente-Crespo M., Francis D., Nashchekina O., Alonso C. R., Palacios I. M.,  
634 2011 *Drosophila* Upf1 and Upf2 loss of function inhibits cell growth and causes  
635 animal death in a Upf3-independent manner. *RNA* **17**: 624–638.
- 636 Boehm V., Haberman N., Ottens F., Ule J., Gehring N. H., 2014 3' UTR length and  
637 messenger ribonucleoprotein composition determine endocleavage efficiencies at  
638 termination codons. *Cell Rep* **9**: 555–568.
- 639 Brand A. H., Perrimon N., 1993 Targeted gene expression as a means of altering cell  
640 fates and generating dominant phenotypes. *Development* **118**: 401–415.
- 641 Cali B. M., Kuchma S. L., Latham J., Anderson P., 1999 smg-7 is required for mRNA  
642 surveillance in *Caenorhabditis elegans*. *Genetics* **151**: 605–616.
- 643 Celik A., Kervestin S., Jacobson A., 2015 NMD: At the crossroads between translation  
644 termination and ribosome recycling. *Biochimie* **114**: 2–9.
- 645 Chakrabarti S., Bonneau F., Schüssler S., Eppinger E., Conti E., 2014 Phospho-  
646 dependent and phospho-independent interactions of the helicase UPF1 with the NMD  
647 factors SMG5-SMG7 and SMG6. *Nucleic Acids Res.* **42**: 9447–9460.
- 648 Chan W.K., Huang L., Gudikote J. P., Chang Y.F., Imam J. S., MacLean J. A., Wilkinson  
649 M. F., 2007 An alternative branch of the nonsense-mediated decay pathway. *EMBO*  
650 *J.* **26**: 1820–1830.
- 651 Chapin A., Hu H., Rynearson S. G., Hollien J., Yandell M., Metzstein M. M., 2014 *In*  
652 *vivo* determination of direct targets of the nonsense-mediated decay pathway in  
653 *Drosophila*. *G3 (Bethesda)* **4**: 485–496.
- 654 Chen Z., Smith K. R., Batterham P., Robin C., 2005 *Smg1* nonsense mutations do not  
655 abolish nonsense-mediated mRNA decay in *Drosophila melanogaster*. *Genetics* **171**:  
656 403–406.
- 657 Chiu S.Y., Serin G., Ohara O., Maquat L. E., 2003 Characterization of human Smg5/7a: a

- 658 protein with similarities to *Caenorhabditis elegans* SMG5 and SMG7 that functions  
659 in the dephosphorylation of Upf1. *RNA* **9**: 77–87.
- 660 Cho H., Han S., Choe J., Park S. G., Choi S. S., Kim Y. K., 2013 SMG5-PNRC2 is  
661 functionally dominant compared with SMG5-SMG7 in mammalian nonsense-  
662 mediated mRNA decay. *Nucleic Acids Res.* **41**: 1319–1328.
- 663 Cho H., Kim K. M., Kim Y. K., 2009 Human proline-rich nuclear receptor coregulatory  
664 protein 2 mediates an interaction between mRNA surveillance machinery and  
665 decapping complex. *Molecular Cell* **33**: 75–86.
- 666 Colombo M., Karousis E. D., Bourquin J., Bruggmann R., Mühlemann O., 2017  
667 Transcriptome-wide identification of NMD-targeted human mRNAs reveals  
668 extensive redundancy between SMG6- and SMG7-mediated degradation pathways.  
669 *RNA* **23**: 189–201.
- 670 Cook R. K., Christensen S. J., Deal J. A., Coburn R. A., Deal M. E., Gresens J. M.,  
671 Kaufman T. C., Cook K. R., 2012 The generation of chromosomal deletions to  
672 provide extensive coverage and subdivision of the *Drosophila melanogaster* genome.  
673 *Genome Biol.* **13**: R21.
- 674 Czaplinski K., Weng Y., Hagan K. W., Peltz S. W., 1995 Purification and  
675 characterization of the Upf1 protein: a factor involved in translation and mRNA  
676 degradation. *RNA* **1**: 610–623.
- 677 Durand S., Franks T. M., Lykke-Andersen J., 2016 Hyperphosphorylation amplifies  
678 UPF1 activity to resolve stalls in nonsense-mediated mRNA decay. *Nature*  
679 *Communications* **7**: 1–12.
- 680 Fisk G. J., Thummel C. S., 1998 The DHR78 nuclear receptor is required for ecdysteroid  
681 signaling during the onset of *Drosophila metamorphosis*. *Cell* **93**: 543–555.
- 682 Förster D., Armbruster K., Luschnig S., 2010 Sec24-dependent secretion drives cell-  
683 autonomous expansion of tracheal tubes in *Drosophila*. *Curr. Biol.* **20**: 62–68.
- 684 Frizzell K. A., Rynearson S. G., Metzstein M. M., 2012 *Drosophila* mutants show NMD  
685 pathway activity is reduced, but not eliminated, in the absence of Smg6. *RNA* **18**:  
686 1475–1486.
- 687 Fukuhara N., Ebert J., Unterholzner L., Lindner D., Izaurralde E., Conti E., 2005 SMG7  
688 is a 14-3-3-like adaptor in the nonsense-mediated mRNA decay pathway. *Molecular*  
689 *Cell* **17**: 537–547.
- 690 Gatfield D., Izaurralde E., 2004 Nonsense-mediated messenger RNA decay is initiated by  
691 endonucleolytic cleavage in *Drosophila*. *Nature* **429**: 575–578.
- 692 Gatfield D., Unterholzner L., Ciccarelli F. D., Bork P., Izaurralde E., 2003 Nonsense-  
693 mediated mRNA decay in *Drosophila*: at the intersection of the yeast and

- 694 mammalian pathways. *EMBO J.* **22**: 3960–3970.
- 695 Gehring N. H., Neu-Yilik G., Schell T., Hentze M. W., 2003 Y14 and hUpf3b form an  
696 NMD-activating complex. *Molecular Cell* **11**: 939–949.
- 697 Grimson A., O'Connor S., Newman C. L., Anderson P., 2004 SMG-1 is a  
698 phosphatidylinositol kinase-related protein kinase required for nonsense-mediated  
699 mRNA Decay in *Caenorhabditis elegans*. *Mol. Cell. Biol.* **24**: 7483–7490.
- 700 He F., Brown A. H., Jacobson A., 1997 Upf1p, Nmd2p, and Upf3p are interacting  
701 components of the yeast nonsense-mediated mRNA decay pathway. *Mol. Cell. Biol.*  
702 **17**: 1580.
- 703 Hodgkin J., Papp A., Pulak R., Ambros V., Anderson P., 1989 A new kind of  
704 informational suppression in the nematode *Caenorhabditis elegans*. *Genetics* **123**:  
705 301–313.
- 706 Hug N., Longman D., Cáceres J. F., 2016 Mechanism and regulation of the nonsense-  
707 mediated decay pathway. *Nucleic Acids Res.*
- 708 Huntzinger E., Kashima I., Fauser M., Saulière J., Izaurralde E., 2008 SMG6 is the  
709 catalytic endonuclease that cleaves mRNAs containing nonsense codons in metazoan.  
710 *RNA* **14**: 2609–2617.
- 711 Kerényi Z., Mérai Z., Hiripi L., Benkovics A., Gyula P., Lacomme C., Barta E., Nagy F.,  
712 Silhavy D., 2008 Inter-kingdom conservation of mechanism of nonsense-mediated  
713 mRNA decay. *EMBO J.* **27**: 1585–1595.
- 714 Le T., Liang Z., Patel H., Yu M. H., Sivasubramaniam G., Slovitt M., Tanentzapf G.,  
715 Mohanty N., Paul S. M., Wu V. M., Beitel G. J., 2006 A new family of *Drosophila*  
716 balancer chromosomes with a w- dfd-GMR yellow fluorescent protein marker.  
717 *Genetics* **174**: 2255–2257.
- 718 Leeds P., Peltz S. W., Jacobson A., Culbertson M. R., 1991 The product of the yeast  
719 UPF1 gene is required for rapid turnover of mRNAs containing a premature  
720 translational termination codon. *Genes & Development* **5**: 2303–2314.
- 721 Leeds P., Wood J. M., Lee B. S., Culbertson M. R., 1992 Gene products that promote  
722 mRNA turnover in *Saccharomyces cerevisiae*. *Mol. Cell. Biol.* **12**: 2165–2177.
- 723 Li T., Shi Y., Wang P., Guachalla L. M., Sun B., Joerss T., Chen Y.-S., Groth M.,  
724 Krueger A., Platzer M., Yang Y.-G., Rudolph K. L., Wang Z.-Q., 2015 Smg6/Est1  
725 licenses embryonic stem cell differentiation via nonsense-mediated mRNA decay.  
726 *EMBO J.* **34**: 1630–1647.
- 727 Loh B., Jonas S., Izaurralde E., 2013 The SMG5-SMG7 heterodimer directly recruits the  
728 CCR4-NOT deadenylase complex to mRNAs containing nonsense codons via  
729 interaction with POP2. *Genes & Development* **27**: 2125–2138.

- 730 Lykke-Andersen J., Shu M. D., Steitz J. A., 2000 Human Upf proteins target an mRNA  
731 for nonsense-mediated decay when bound downstream of a termination codon. *Cell*  
732 **103**: 1121–1131.
- 733 Lykke-Andersen S., Chen Y., Ardal B. R., Lilje B., Waage J., Sandelin A., Jensen T. H.,  
734 2014 Human nonsense-mediated RNA decay initiates widely by endonucleolysis and  
735 targets snoRNA host genes. *Genes & Development* **28**: 2498–2517.
- 736 Medghalchi S. M., Frischmeyer P. A., Mendell J. T., Kelly A. G., Lawler A. M., Dietz H.  
737 C., 2001 Rent1, a trans-effector of nonsense-mediated mRNA decay, is essential for  
738 mammalian embryonic viability. *Hum. Mol. Genet.* **10**: 99–105.
- 739 Metzstein M. M., Krasnow M. A., 2006 Functions of the nonsense-mediated mRNA  
740 decay pathway in *Drosophila* development. *PLoS Genet.* **2**: e180.
- 741 Nelson J. O., Moore K. A., Chapin A., Hollien J., Metzstein M. M., 2016 Degradation of  
742 *Gadd45* mRNA by nonsense-mediated decay is essential for viability. *Elife* **5**: 624.
- 743 Nicholson P., Josi C., Kurosawa H., Yamashita A., Mühlemann O., 2014 A novel  
744 phosphorylation-independent interaction between SMG6 and UPF1 is essential for  
745 human NMD. *Nucleic Acids Research* **45**:9217-9235.
- 746 Ohnishi T., Yamashita A., Kashima I., Schell T., Anders K. R., Grimson A., Hachiya T.,  
747 Hentze M. W., Anderson P., Ohno S., 2003 Phosphorylation of hUPF1 induces  
748 formation of mRNA surveillance complexes containing hSMG-5 and hSMG-7.  
749 *Molecular Cell* **12**: 1187–1200.
- 750 Okada-Katsuhata Y., Yamashita A., Kutsuzawa K., Izumi N., Hirahara F., Ohno S., 2012  
751 N- and C-terminal Upf1 phosphorylations create binding platforms for SMG-6 and  
752 SMG-5:SMG-7 during NMD. *Nucleic Acids Res.* **40**: 1251–1266.
- 753 Ottens F., Boehm V., Sibley C. R., Ule J., Gehring N. H., 2017 Transcript-specific  
754 characteristics determine the contribution of endo- and exonucleolytic decay  
755 pathways during the degradation of nonsense-mediated decay substrates. *RNA* **23**:  
756 1224–1236.
- 757 Page M. F., Carr B., Anders K. R., Grimson A., Anderson P., 1999 SMG-2 is a  
758 phosphorylated protein required for mRNA surveillance in *Caenorhabditis elegans*  
759 and related to Upf1p of yeast. *Mol. Cell. Biol.* **19**: 5943–5951.
- 760 Peccarelli M., Kebaara B. W., 2014 Regulation of natural mRNAs by the nonsense-  
761 mediated mRNA decay pathway. *Eukaryotic Cell* **13**: 1126–1135.
- 762 Rehwinkel J., Letunic I., Raes J., Bork P., Izaurralde E., 2005 Nonsense-mediated mRNA  
763 decay factors act in concert to regulate common mRNA targets. *RNA* **11**: 1530–  
764 1544.
- 765 Schmidt S. A., Foley P. L., Jeong D. H., Rymarquis L. A., Doyle F., Tenenbaum S. A.,

- 766 Belasco J. G., Green P. J., 2015 Identification of SMG6 cleavage sites and a  
767 preferred RNA cleavage motif by global analysis of endogenous NMD targets in  
768 human cells. *Nucleic Acids Res.* **43**: 309–323.
- 769 Siwaszek A., Ukleja M., Dziembowski A., 2014 Proteins involved in the degradation of  
770 cytoplasmic mRNA in the major eukaryotic model systems. *RNA Biology* **11**: 1122–  
771 1136.
- 772 Till D. D., Linz B., Seago J. E., Elgar S. J., Marujo P. E., de L Elias, M., Arraiano, C. M.,  
773 McClellan, J. A., McCarthy, J. E. G., Newbury, S. F., 1998 Identification and  
774 developmental expression of a 5′–3′ exoribonuclease from *Drosophila melanogaster*.  
775 *Mechanisms of Development* **79**: 51–55.
- 776 Venken K. J. T., He Y., Hoskins R. A., Bellen H. J., 2006 P[acman]: a BAC transgenic  
777 platform for targeted insertion of large DNA fragments in *D. melanogaster*. *Science*  
778 **314**: 1747–1751.
- 779 Waldron J. A., Jones C. I., Towler B. P., Pashler A. L., Grima D. P., Hebbes S.,  
780 Crossman S. H., Zabolotskaya M. V., Newbury S. F., 2015 Xrn1/Pacman affects  
781 apoptosis and regulates expression of hid and reaper. *Biology Open* **4**: 649–660.
- 782 Weischenfeldt J., Damgaard I., Bryder D., Theilgaard-Mönch K., Thoren L. A., Nielsen  
783 F. C., Jacobsen S. E. W., Nerlov C., Porse B. T., 2008 NMD is essential for  
784 hematopoietic stem and progenitor cells and for eliminating by-products of  
785 programmed DNA rearrangements. *Genes & Development* **22**: 1381–1396.
- 786 Weng Y., Czaplinski K., Peltz S. W., 1996a Identification and characterization of  
787 mutations in the UPF1 gene that affect nonsense suppression and the formation of the  
788 Upf protein complex but not mRNA turnover. *Mol. Cell. Biol.* **16**: 5491–5506.
- 789 Weng Y., Czaplinski K., Peltz S. W., 1996b Genetic and biochemical characterization of  
790 mutations in the ATPase and helicase regions of the Upf1 protein. *Mol. Cell. Biol.*  
791 **16**: 5477–5490.
- 792 Wittkopp N., Huntzinger E., Weiler C., Saulière J., Schmidt S., Sonawane M., Izaurralde  
793 E., 2009 Nonsense-mediated mRNA decay effectors are essential for zebrafish  
794 embryonic development and survival. *Mol. Cell. Biol.* **29**: 3517–3528.
- 795 Wodarz A., Hinz U., Engelbert M., Knust E., 1995 Expression of crumbs confers apical  
796 character on plasma membrane domains of ectodermal epithelia of *Drosophila*. *Cell*  
797 **82**: 67–76.
- 798 Yamashita A., Ohnishi T., Kashima I., Taya Y., Ohno S., 2001 Human SMG-1, a novel  
799 phosphatidylinositol 3-kinase-related protein kinase, associates with components of  
800 the mRNA surveillance complex and is involved in the regulation of nonsense-  
801 mediated mRNA decay. *Genes & Development* **15**: 2215–2228.
- 802 Yoine M., Nishii T., Nakamura K., 2006 *Arabidopsis* UPF1 RNA helicase for nonsense-

803 mediated mRNA decay is involved in seed size control and is essential for growth.  
804 *Plant Cell Physiol.* **47**: 572–580.

805

Figure 1

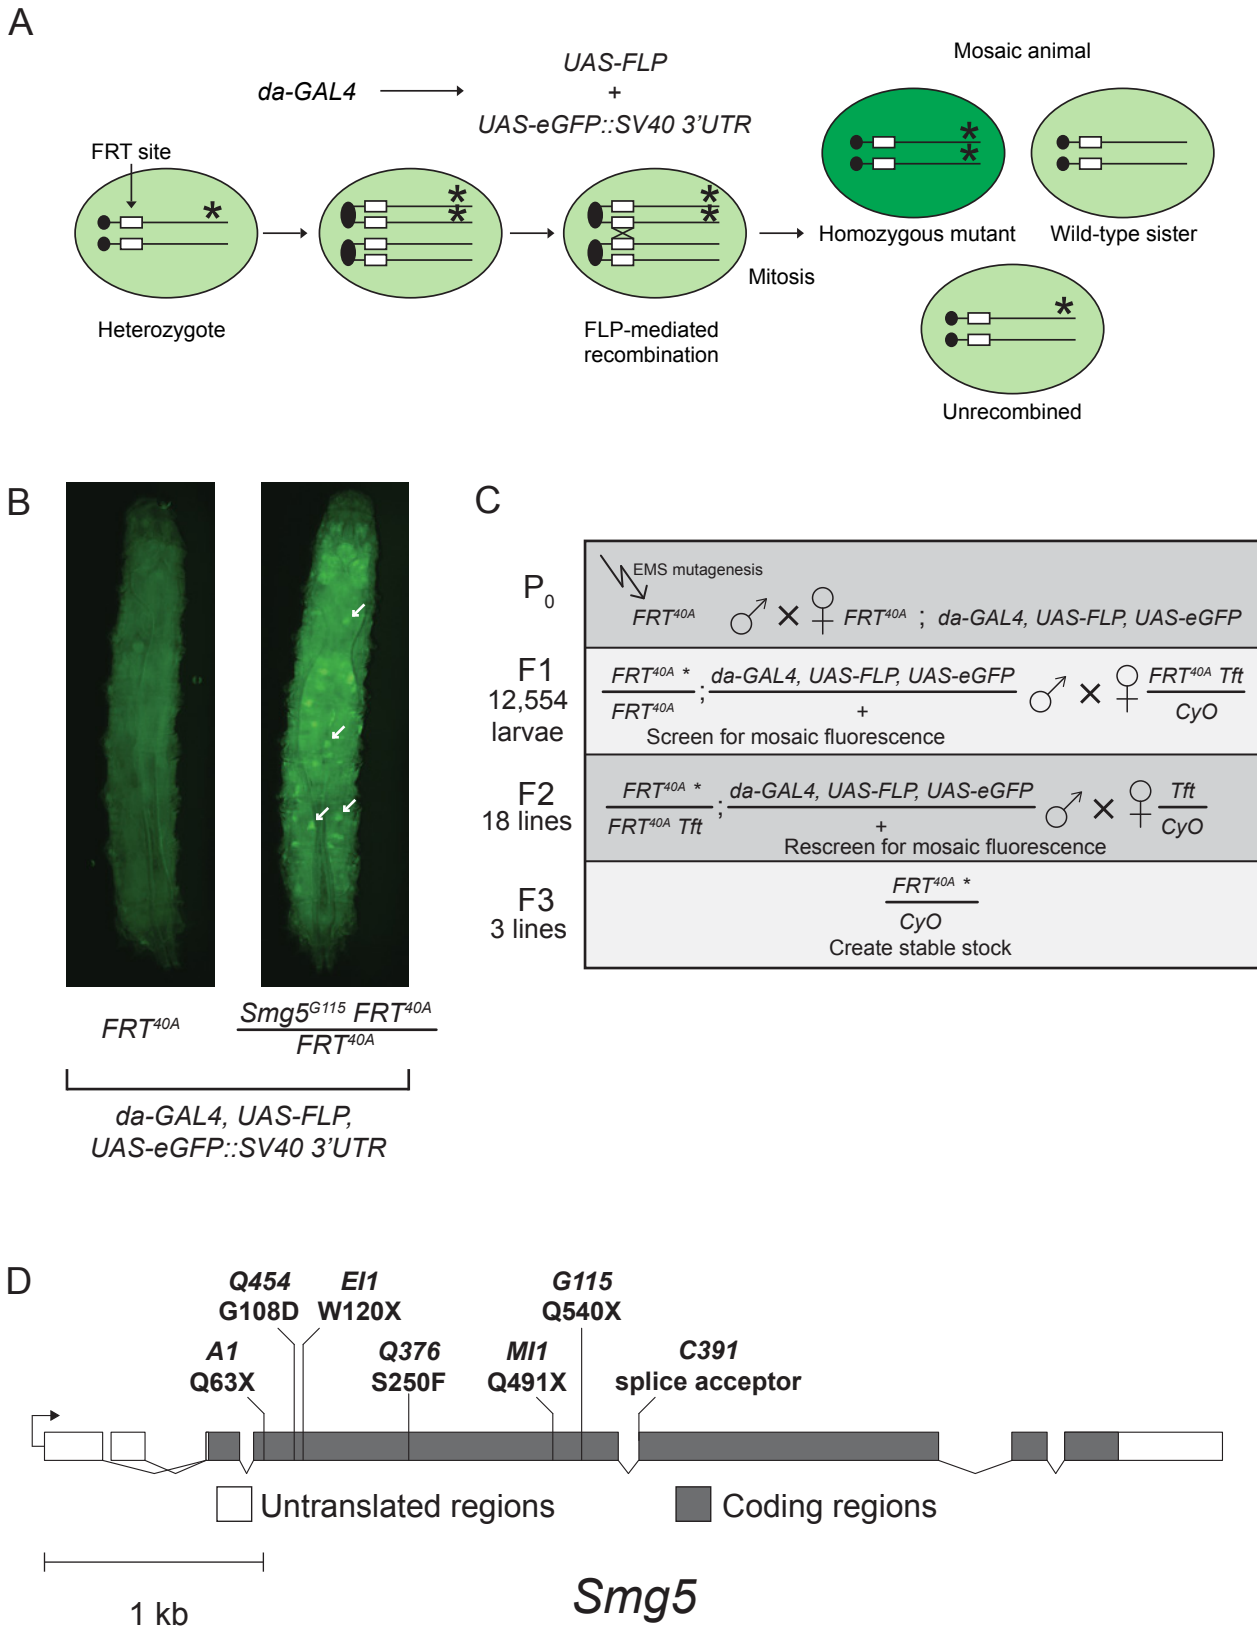

Figure 2

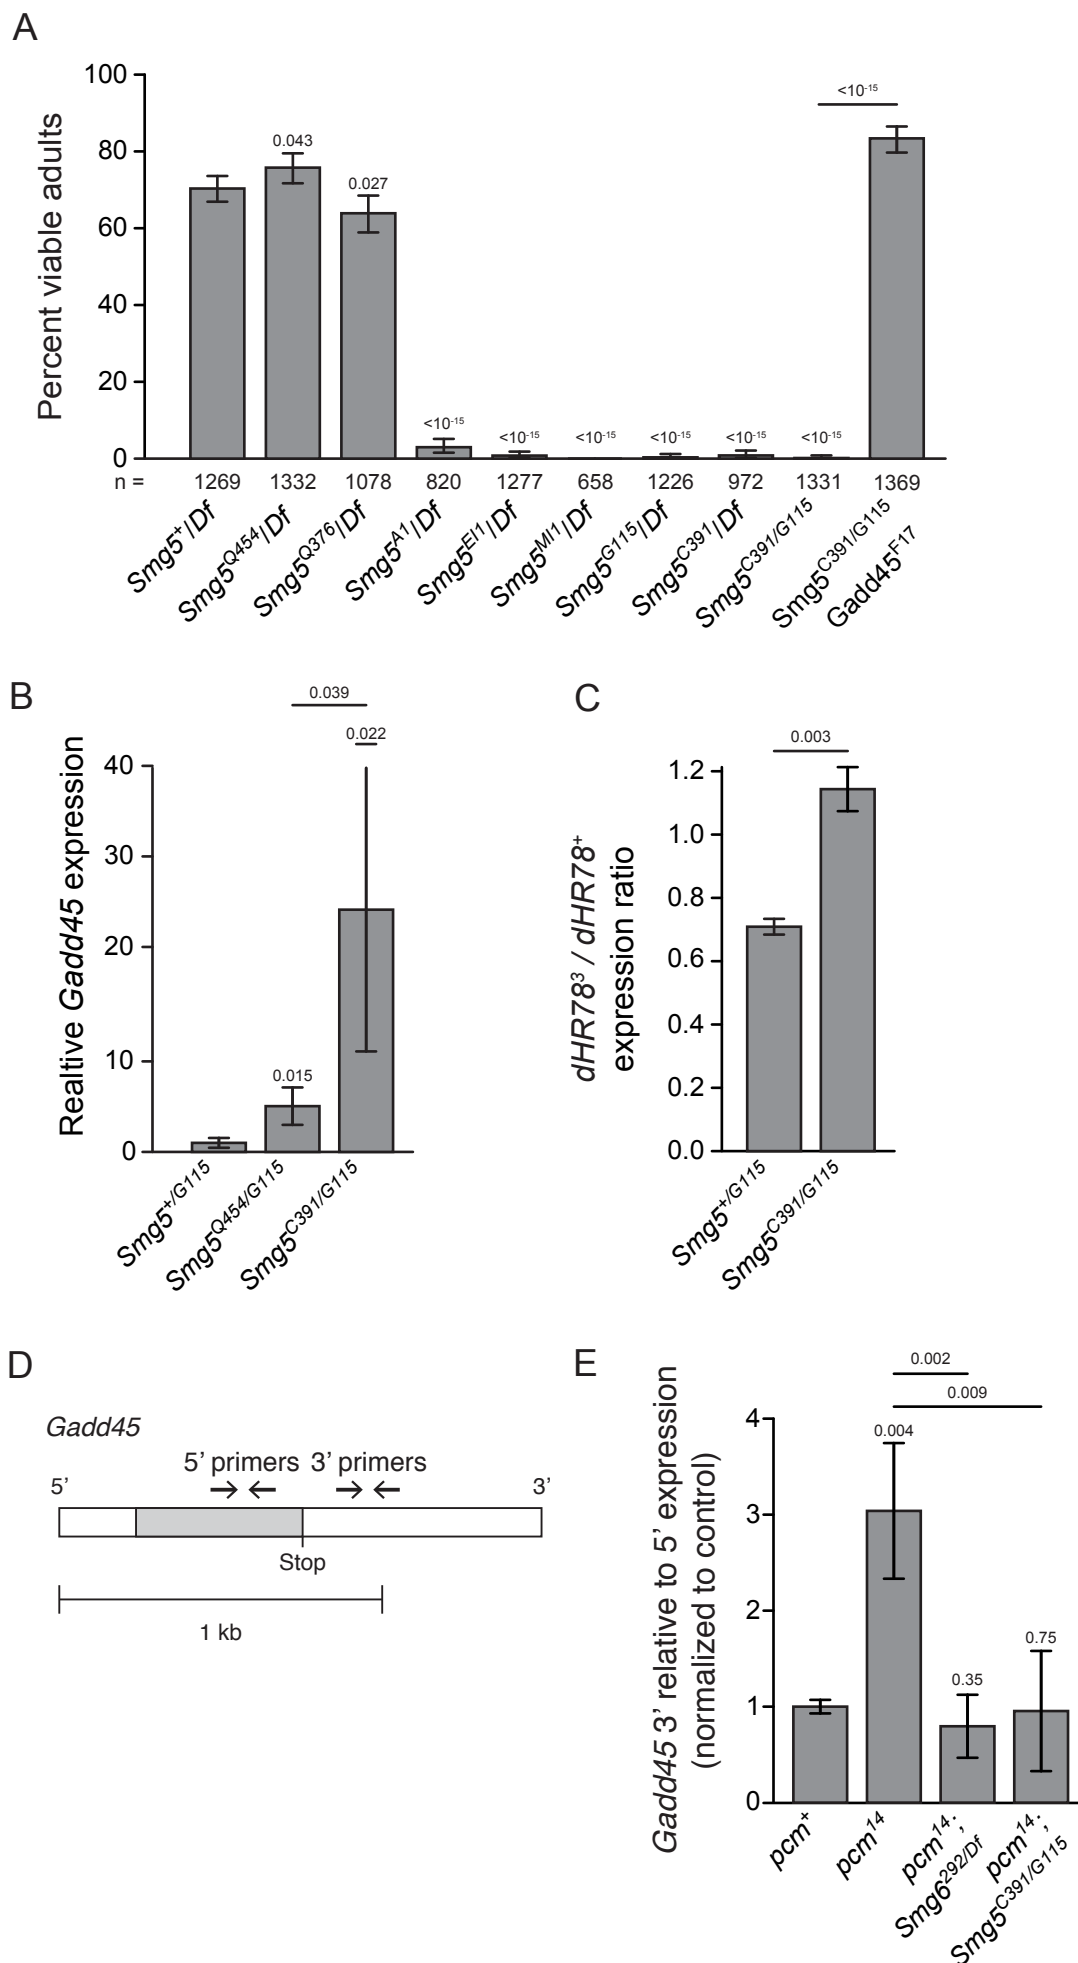



Figure 3

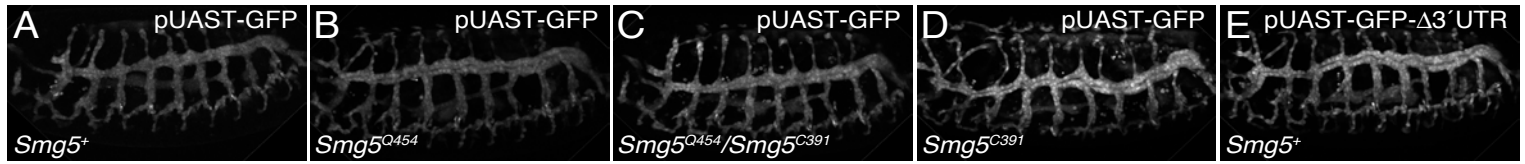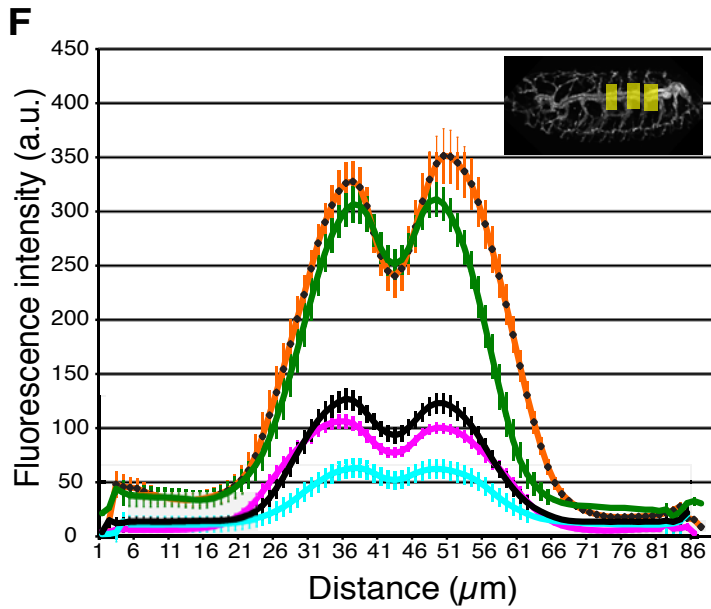

| <i>Smg5</i> genotype             | SV40 3' UTR | n  |
|----------------------------------|-------------|----|
| <i>Smg5</i> <sup>+</sup>         | FL          | 16 |
| <i>Smg5</i> <sup>C391</sup>      | FL          | 14 |
| <i>Smg5</i> <sup>Q454</sup>      | FL          | 9  |
| <i>Smg5</i> <sup>C391/Q454</sup> | FL          | 22 |
| <i>Smg5</i> <sup>+</sup>         | Δ           | 13 |

## Figure 4

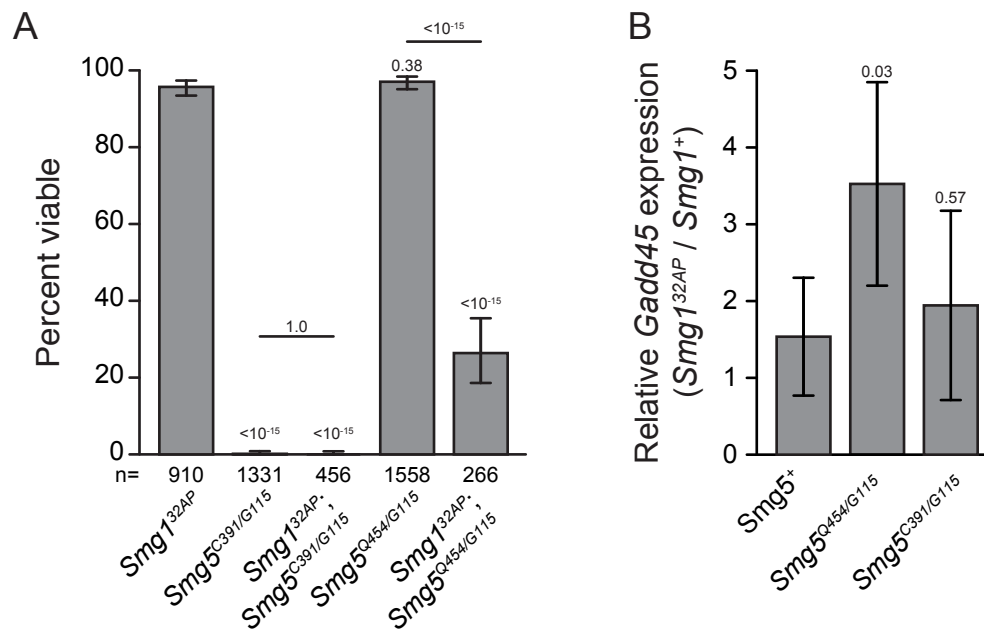

## Figure 5

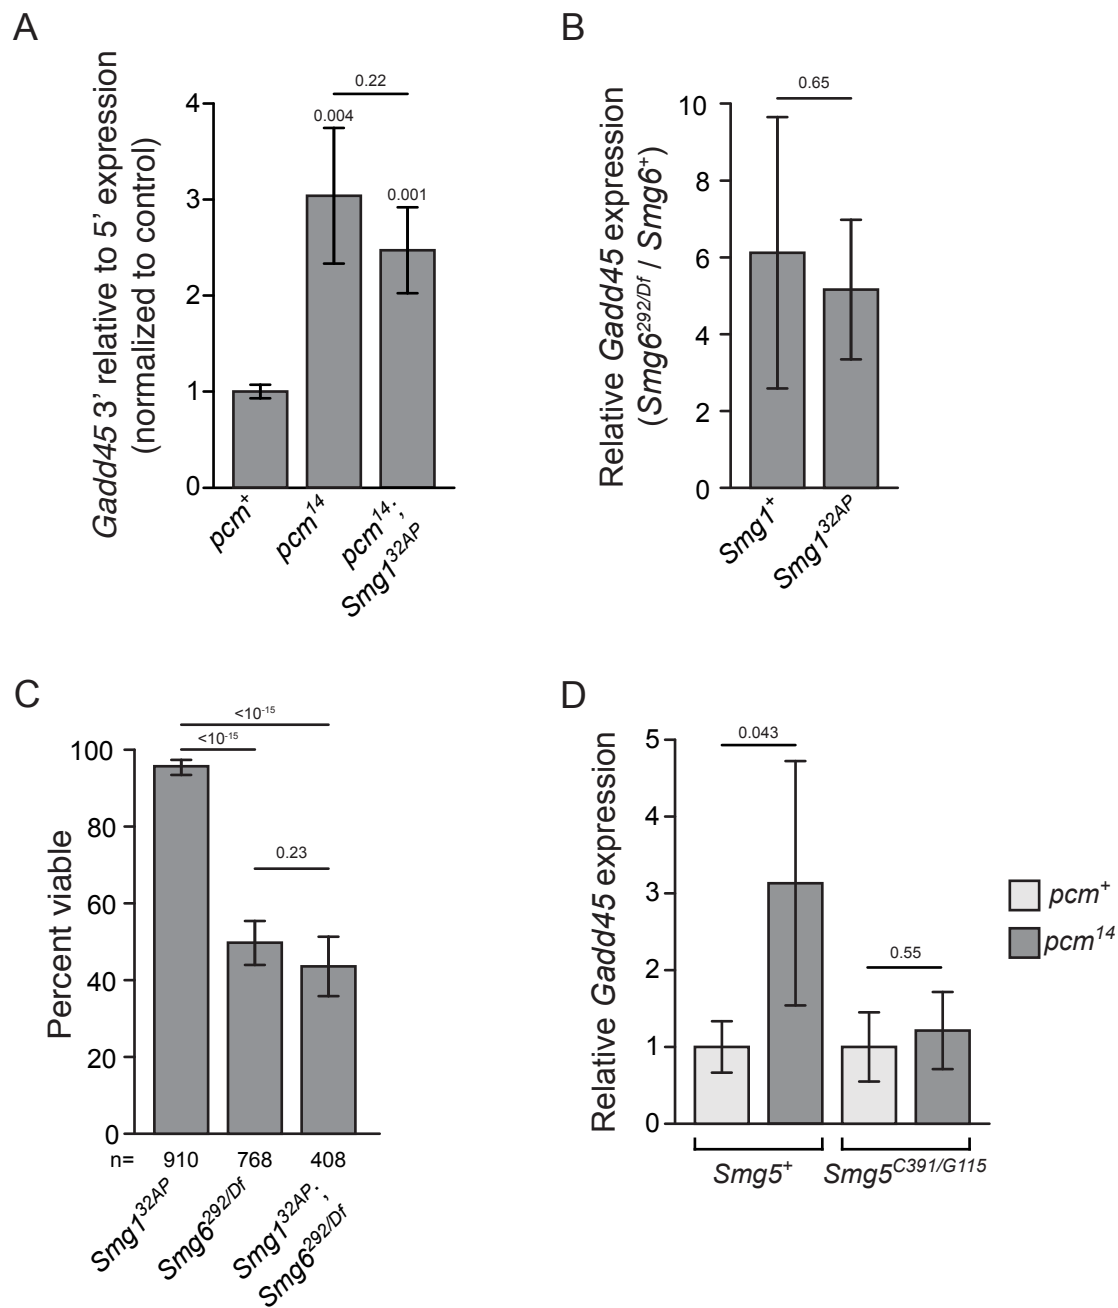

# Supplemental Figure 1

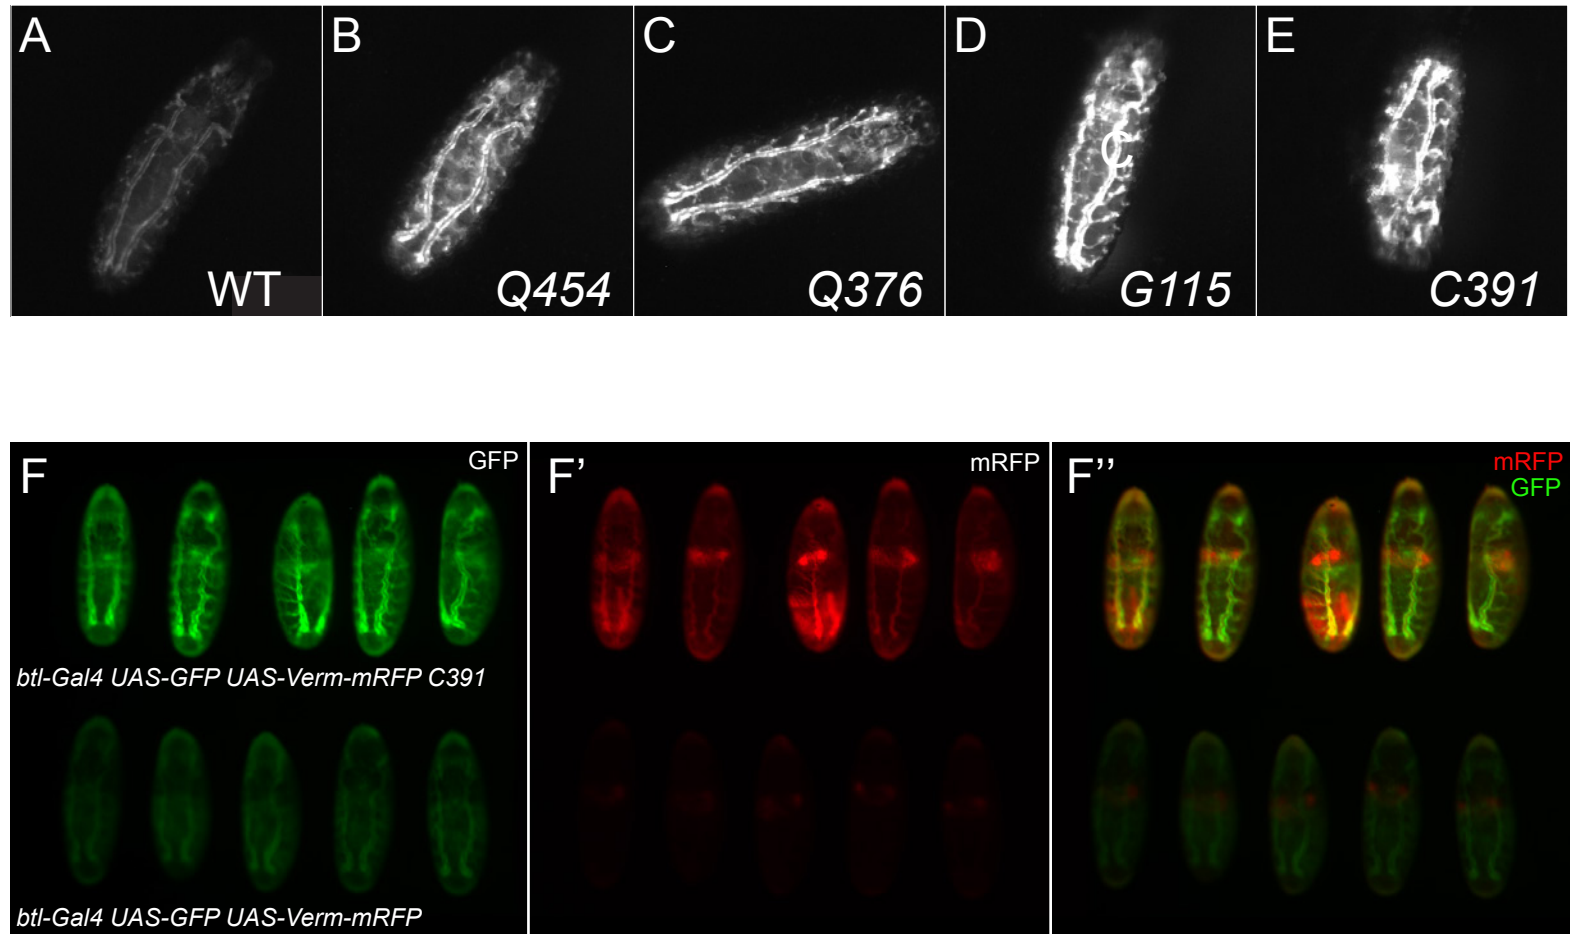

## Supplemental Figure 2

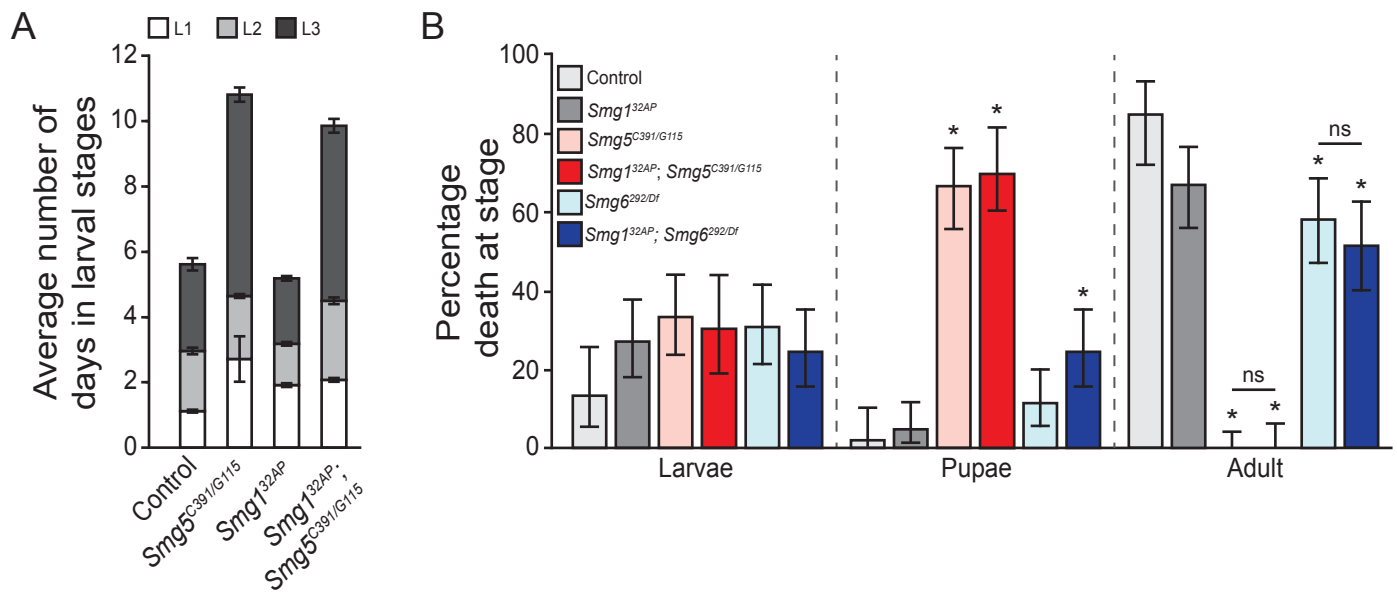

## Supplemental Figure 3

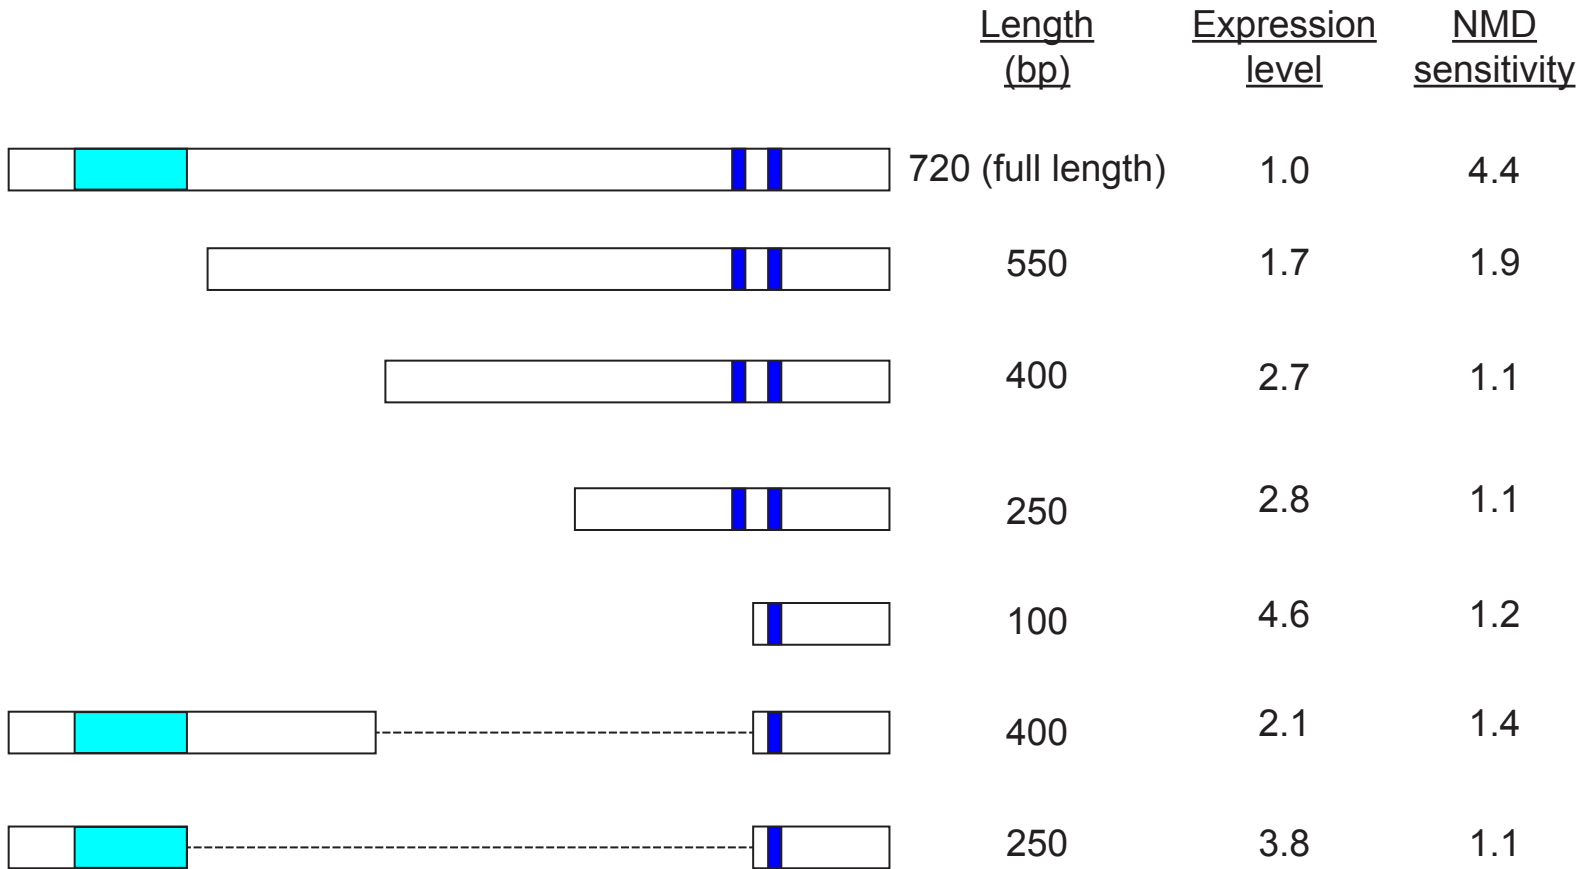

Source: https://www.biorxiv.org/content/10.1101/219725v1.full.pdf
